# Supplementary material for: Multicolor mechanochromism of a multinetwork elastomer that can distinguish between low and high stress
Source: Royal Society of Chemistry journal article supplement (doi:10.1039/d1py00637a), 2021-01-01
Supplement: d1py00637a1.pdf [file d1py00637a1.pdf]

## Supporting information

### **Multicolor mechanochromism of a multinetwork elastomer that can distinguish between low and high stress**

Taisheng Wang,<sup>a,b</sup> Haoxiang Wang,<sup>a</sup> Lei Shen,<sup>a</sup> Na Zhang<sup>a,b\*</sup>

<sup>a</sup> School of Materials Science and Engineering, Nanjing Institute of Technology, Nanjing, 211167, P. R. China.

<sup>b</sup> Jiangsu Key Laboratory of Advanced Structural Materials and Application Technology, Nanjing, 211167, P. R. China.

Correspondence to: Na Zhang (Email: zhangna@njit.edu.cn)

#### **Table of contents**

|                                               |    |
|-----------------------------------------------|----|
| 1. Experimental section.....                  | 2  |
| 2. NMR spectra.....                           | 3  |
| 3. Mass spectra.....                          | 10 |
| 4. Compositions of TN.....                    | 11 |
| 5. IR spectra, DSC and TG profiles.....       | 11 |
| 6. Uniaxial tension of the elastomers.....    | 16 |
| 7. Fluorometric and ultraviolet analysis..... | 17 |

## 1. Experimental section

**RH** and **AMA** were synthesized according to **Scheme S1**.

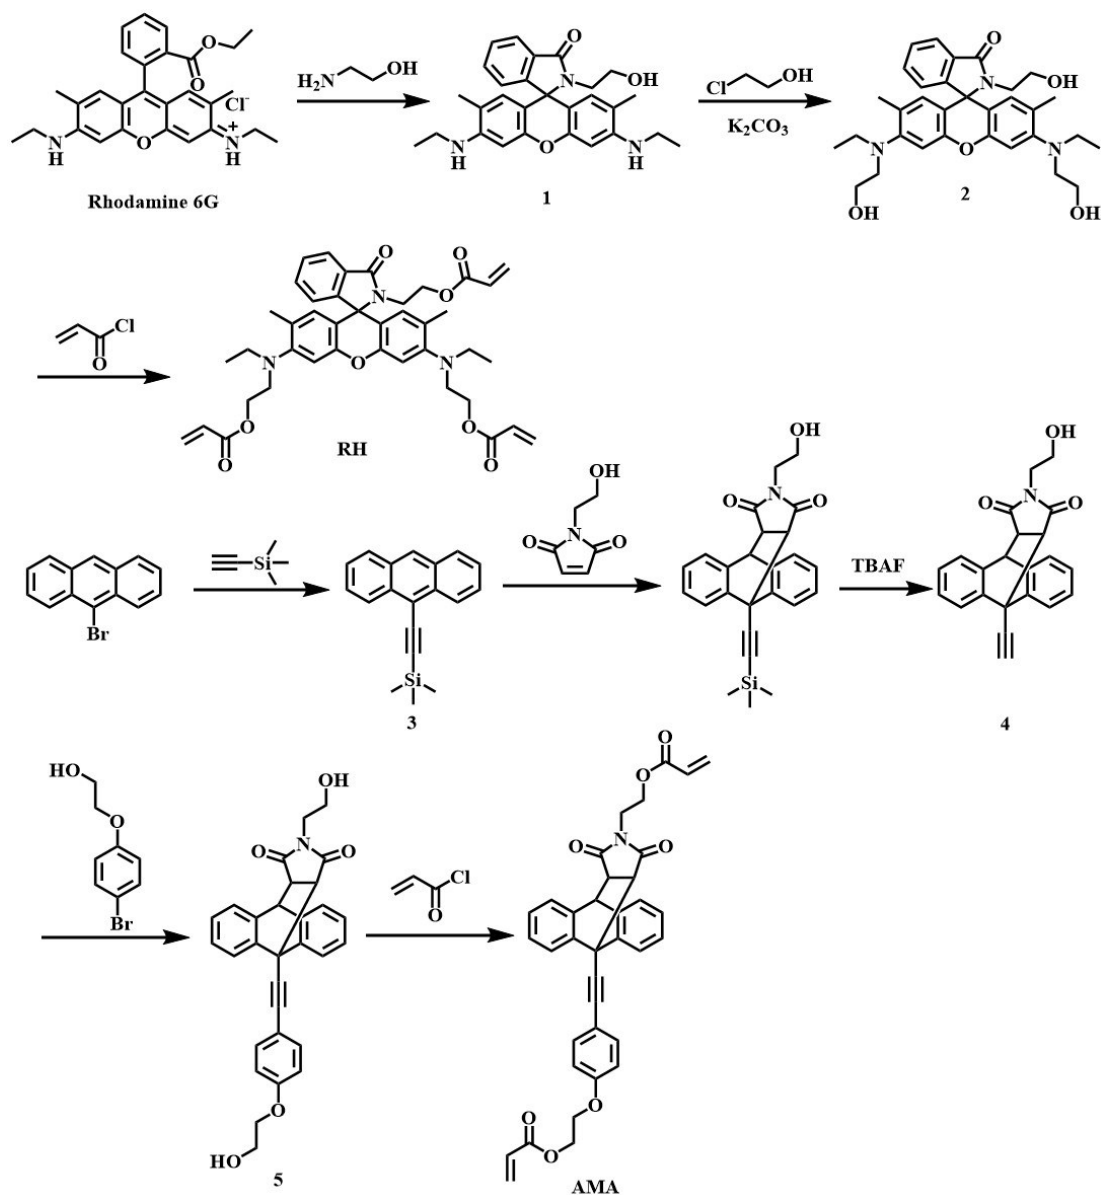

**Scheme S1.** Synthetic routes for the **RH** and **AMA**.

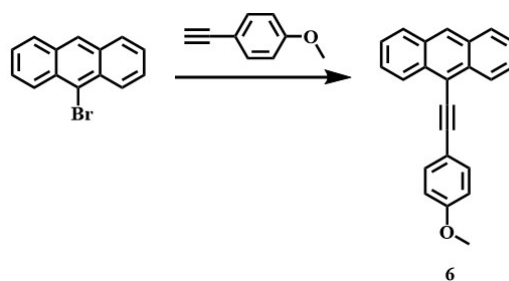

**Scheme S2.** Synthetic route for the reference compound **6**

## 2. NMR spectra

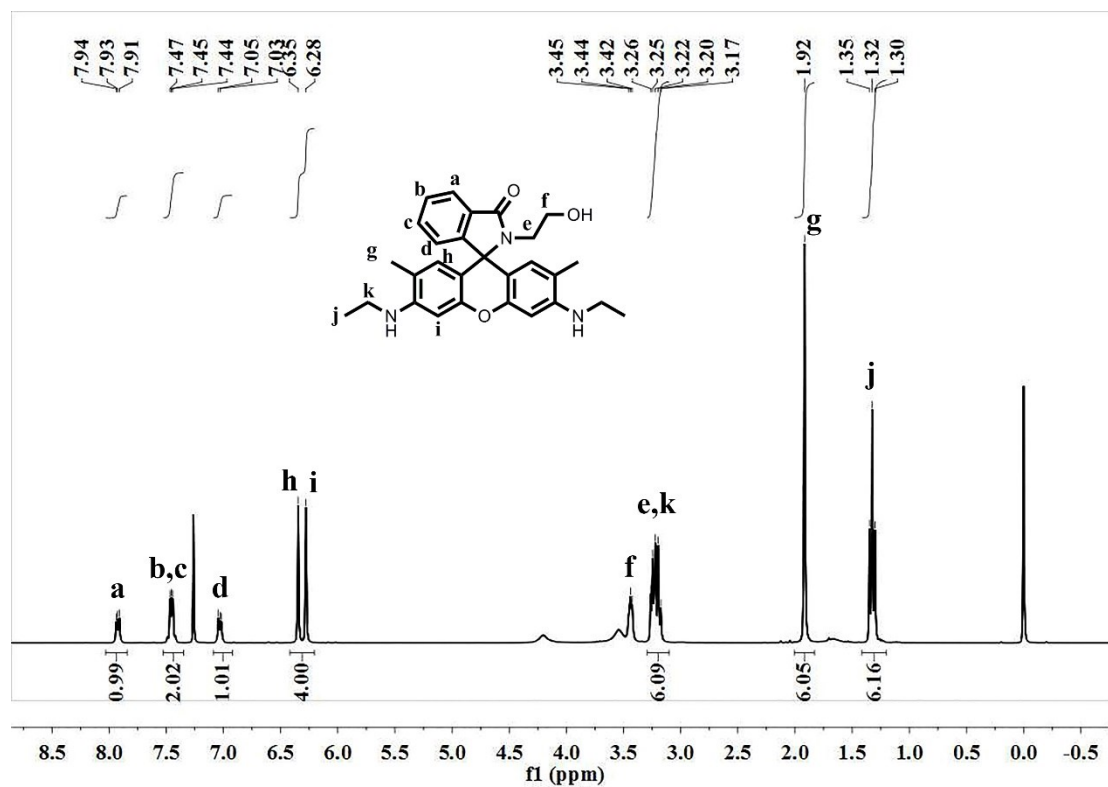

**Figure S1.**  $^1\text{H}$  NMR spectrum of compound **1** in  $\text{CDCl}_3$ .

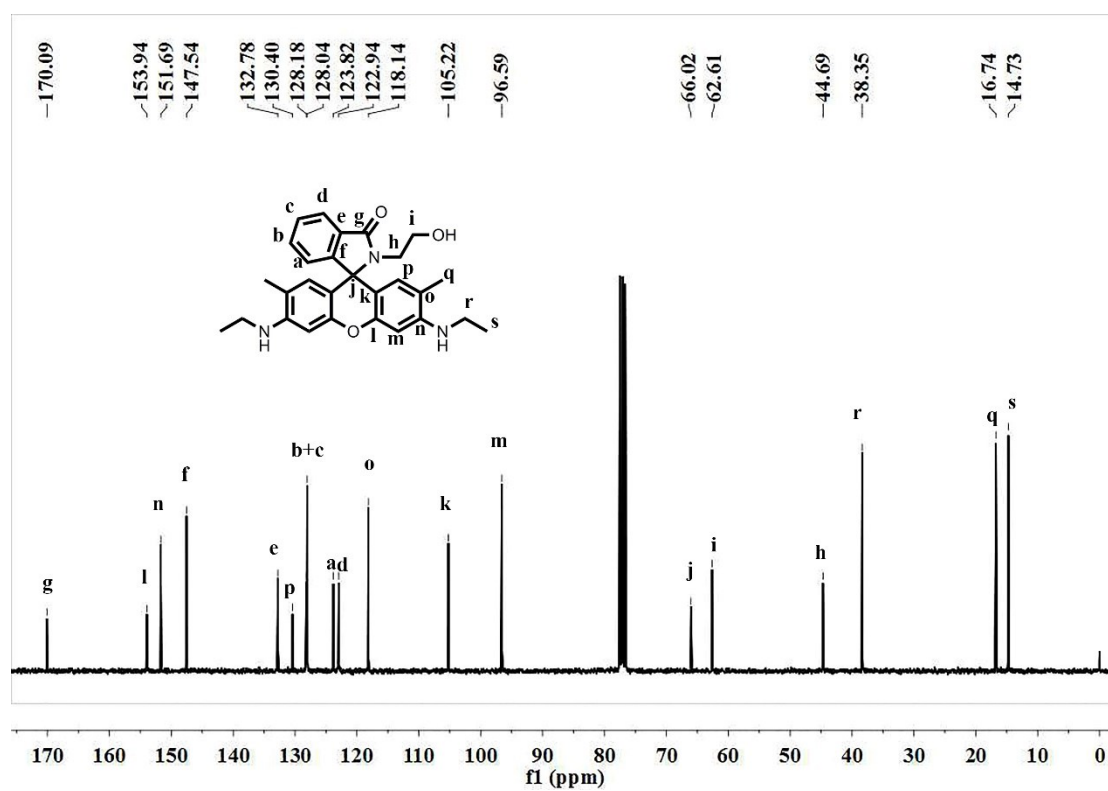

**Figure S2.**  $^{13}\text{C}$  NMR spectrum of compound **1** in  $\text{CDCl}_3$ .

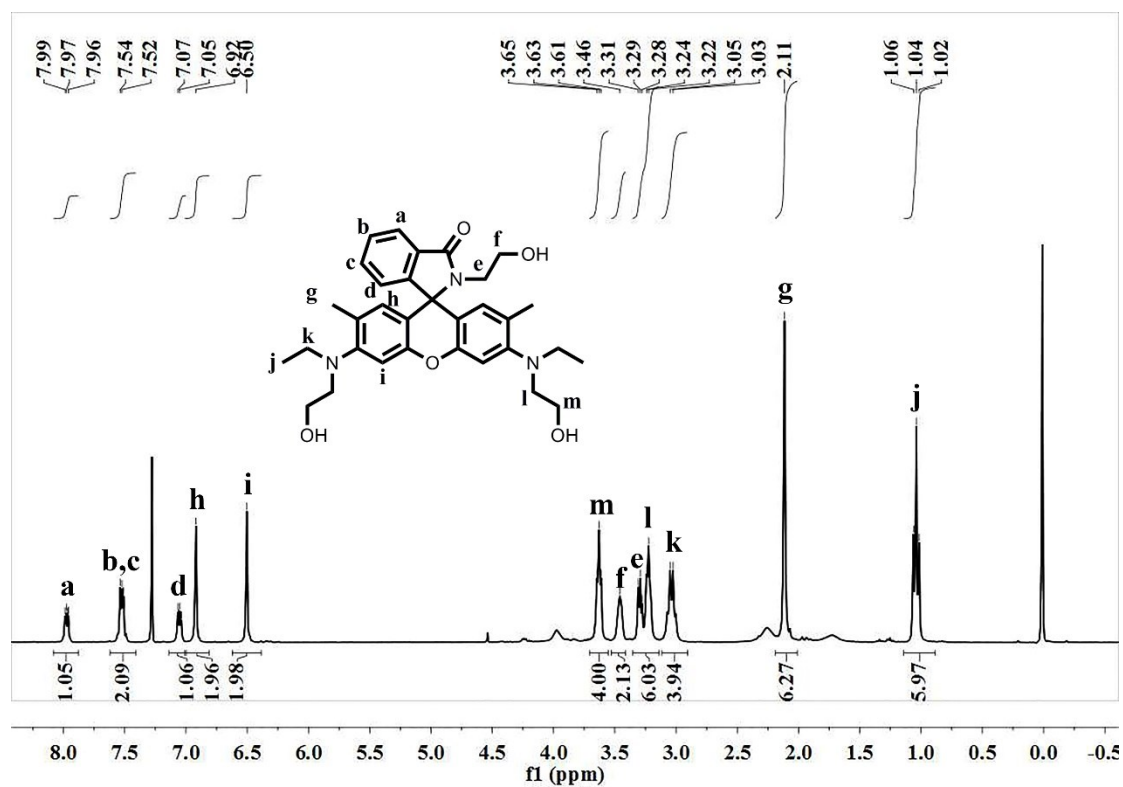

Figure S3.  $^1\text{H}$  NMR spectrum of compound 2 in  $\text{CDCl}_3$ .

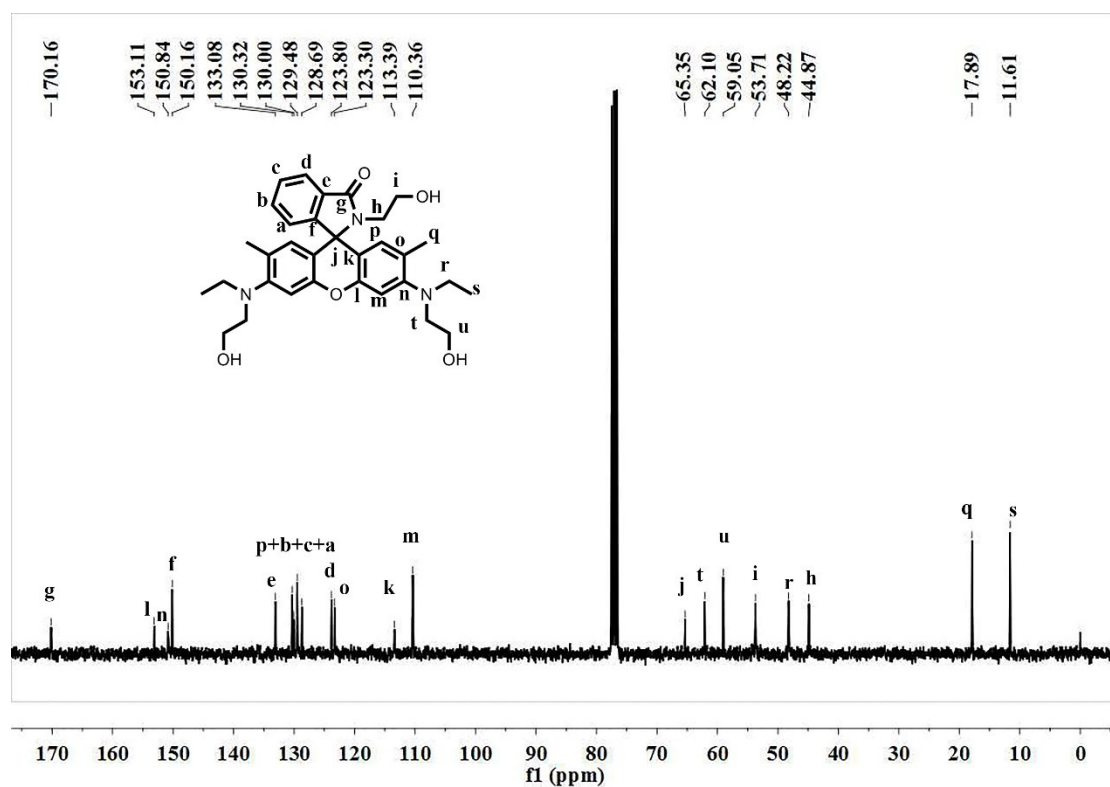

Figure S4.  $^{13}\text{C}$  NMR spectrum of compound 2 in  $\text{CDCl}_3$ .

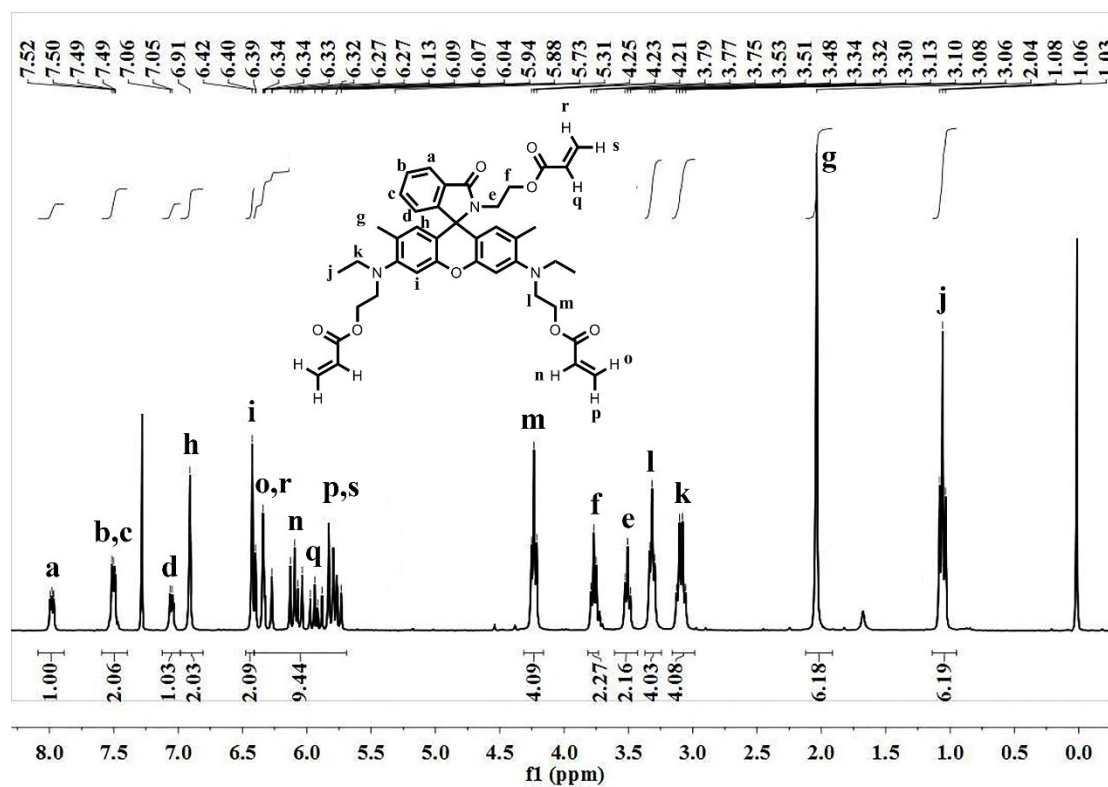

Figure S5.  $^1\text{H}$  NMR spectrum of RH in  $\text{CDCl}_3$ .

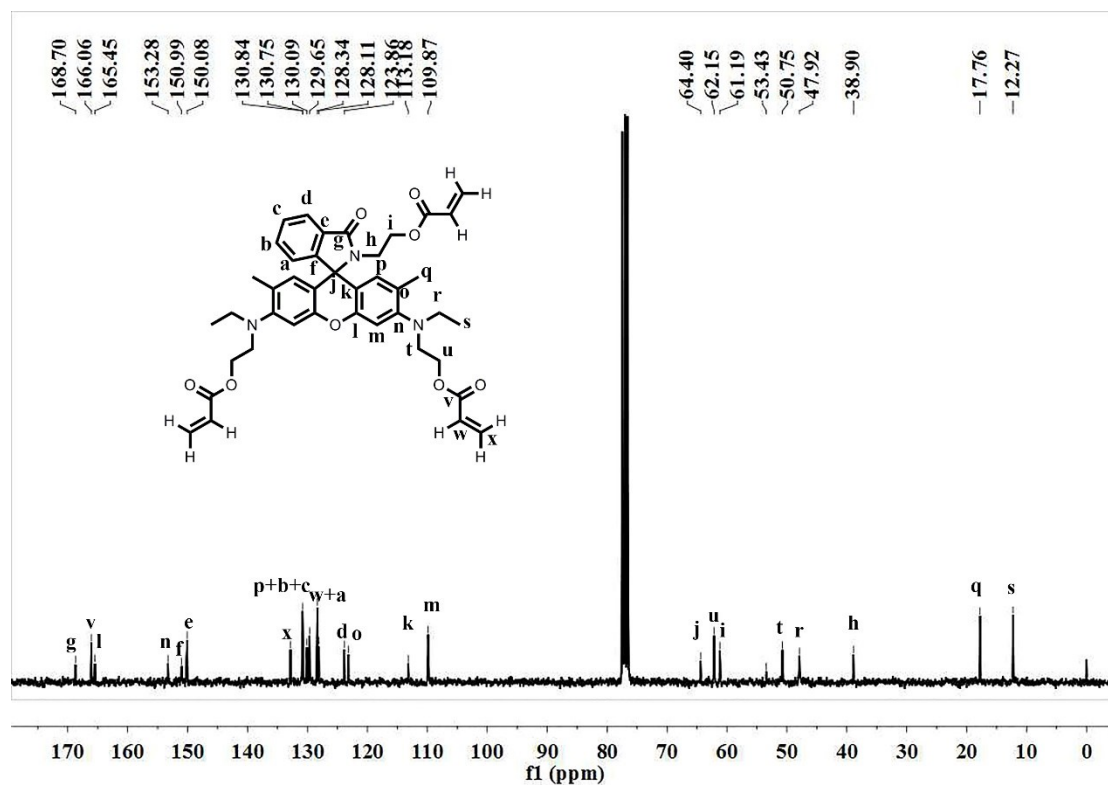

Figure S6.  $^{13}\text{C}$  NMR spectrum of RH in  $\text{CDCl}_3$ .

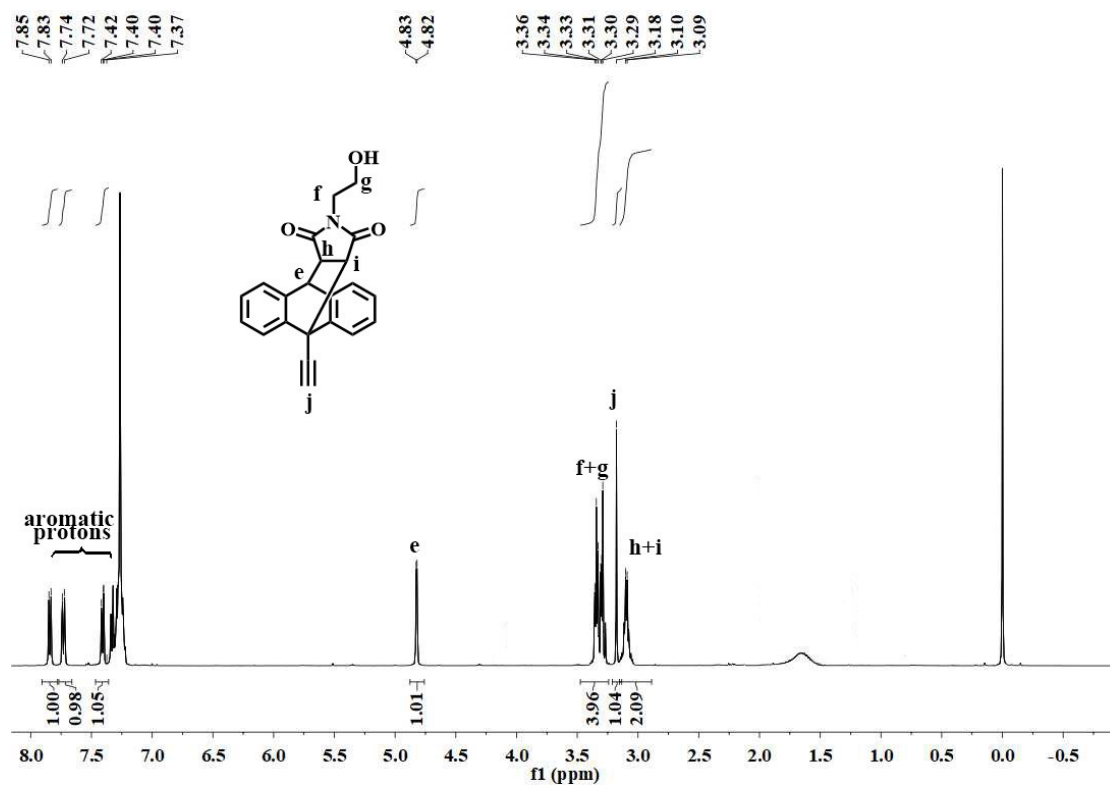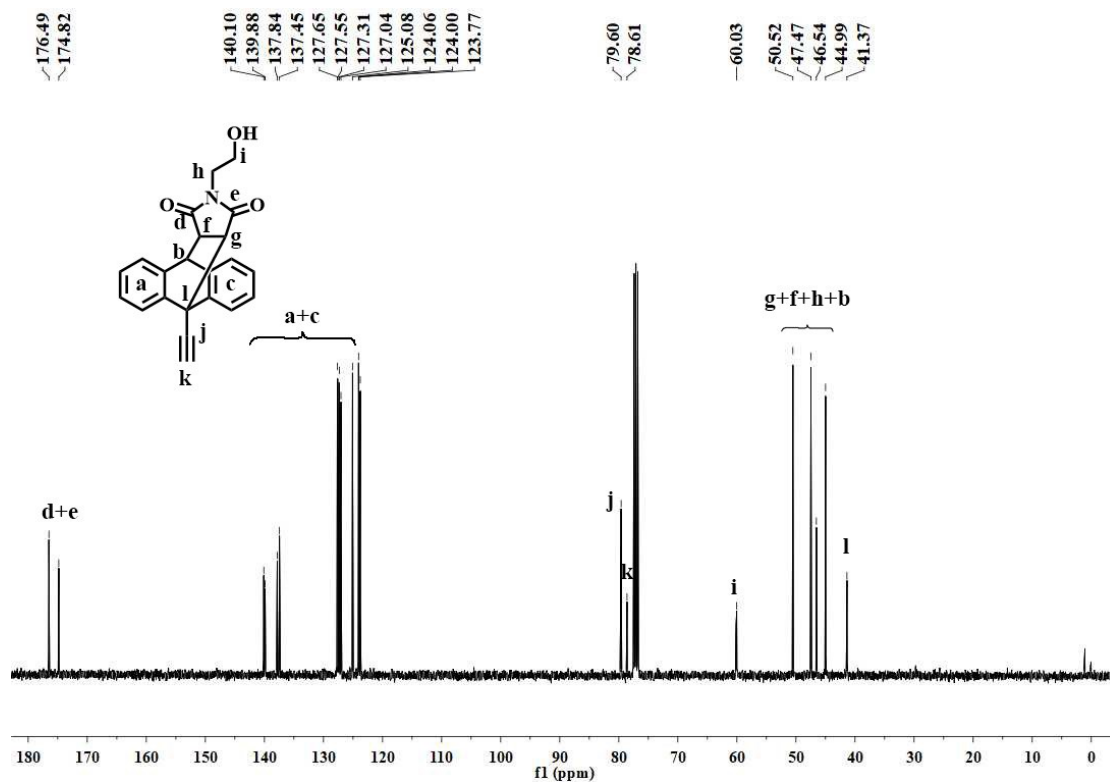

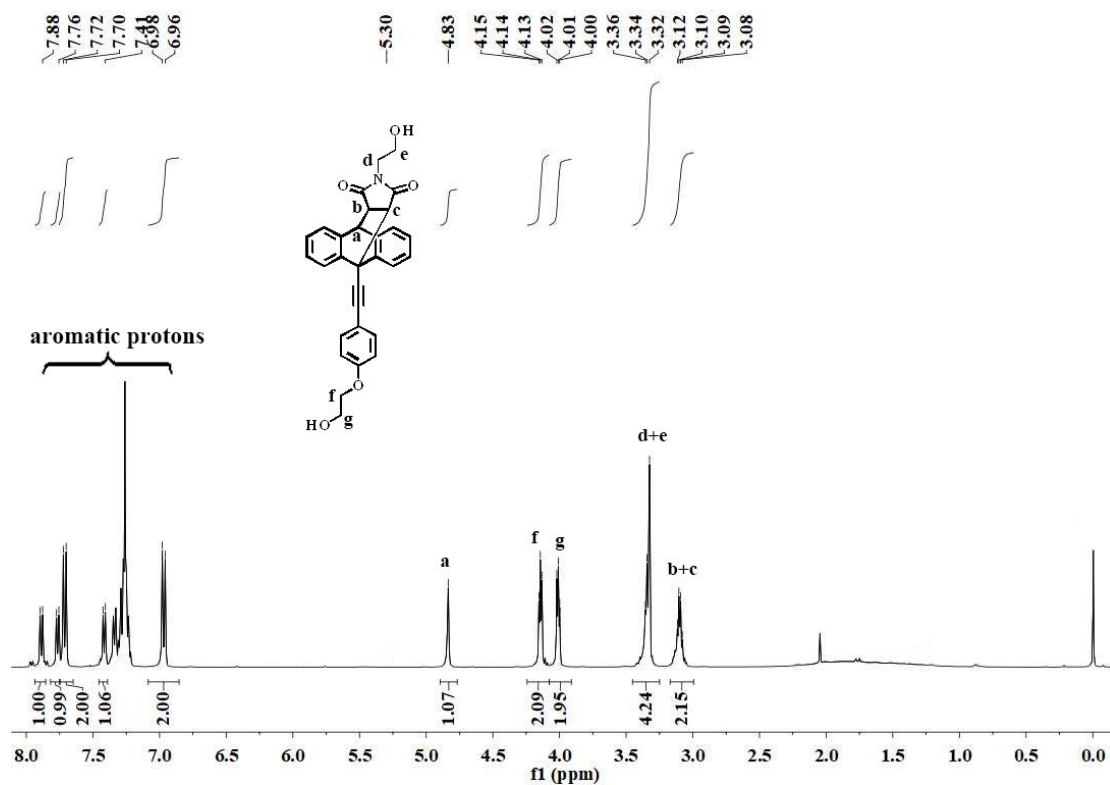

Figure S9. <sup>1</sup>H NMR spectrum of compound 5 in CDCl<sub>3</sub>.

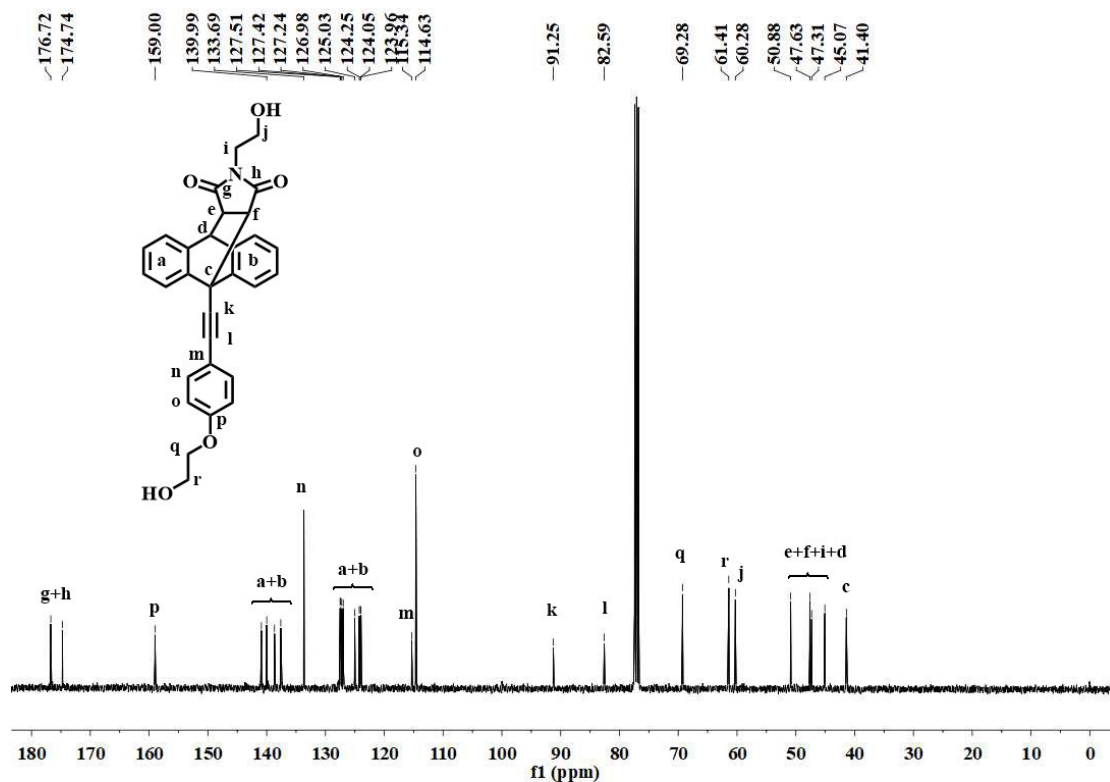

Figure S10. <sup>13</sup>C NMR spectrum of compound 5 in CDCl<sub>3</sub>.

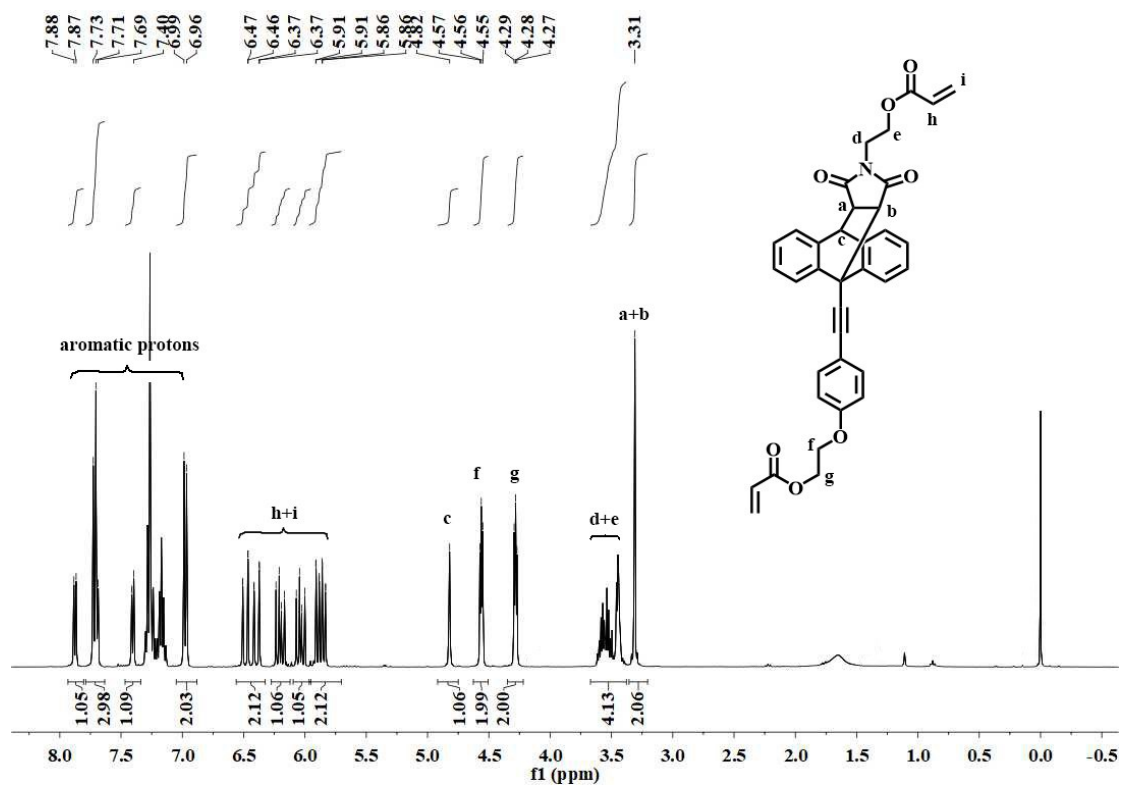

Figure S11.  $^1\text{H}$  NMR spectrum of AMA in  $\text{CDCl}_3$ .

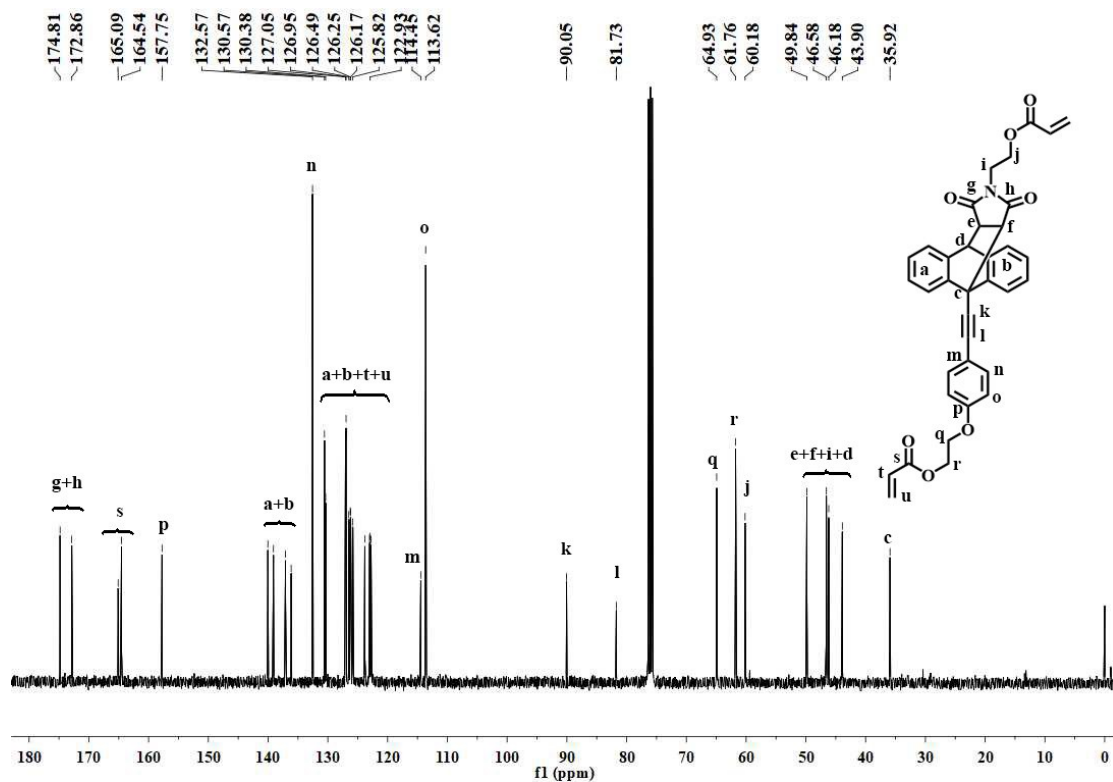

Figure S12.  $^{13}\text{C}$  NMR spectrum of AMA in  $\text{CDCl}_3$ .



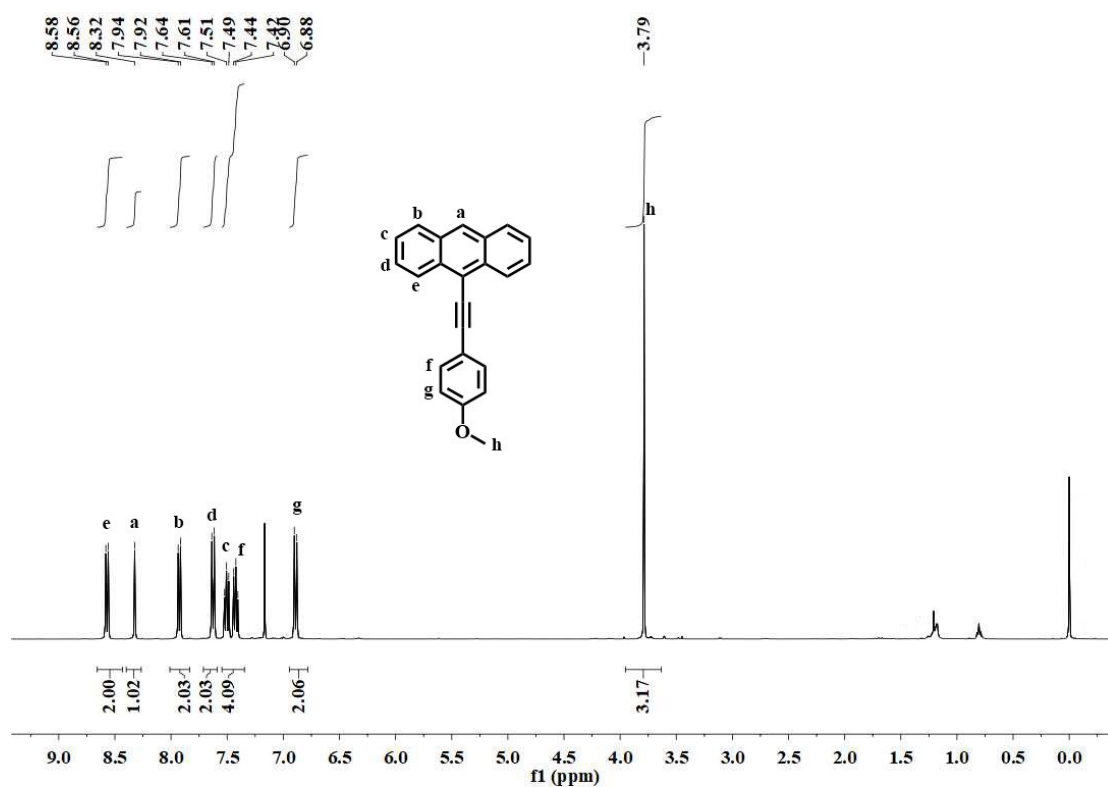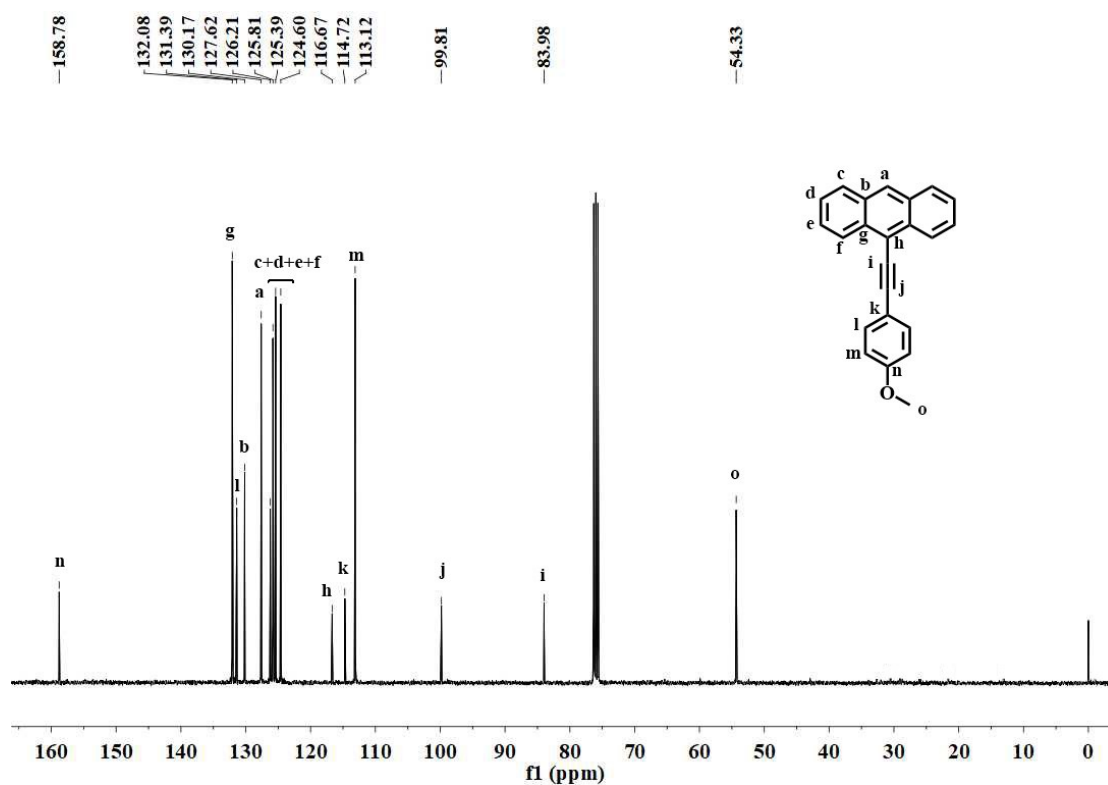

### 3. Mass spectra

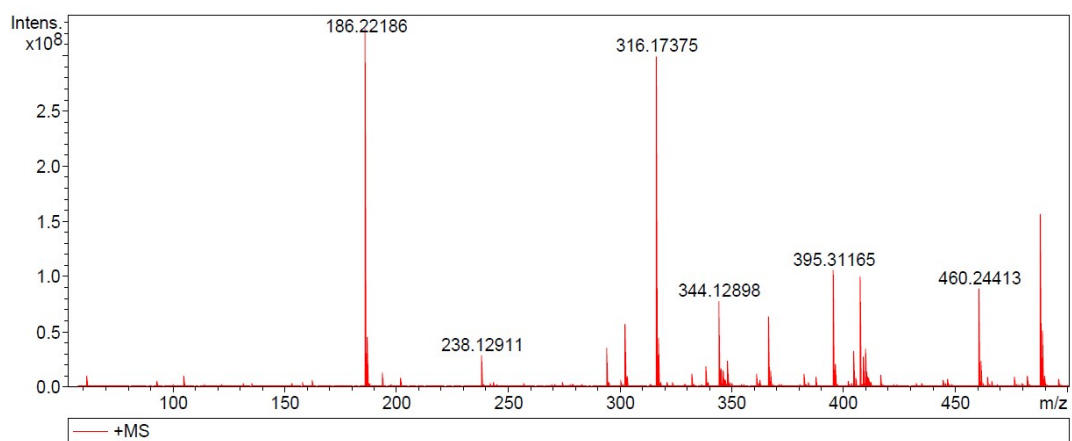

Figure S15. Mass spectrum of compound 4.

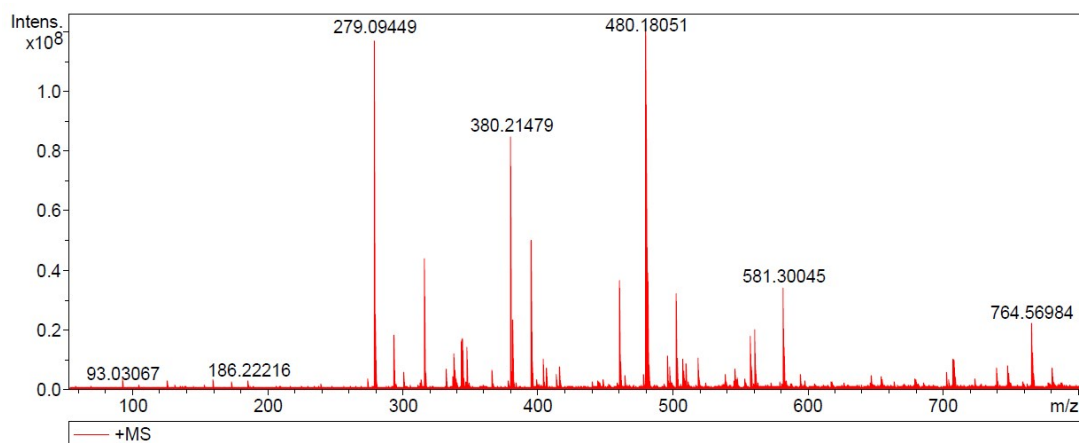

Figure S16. Mass spectrum of compound 5.

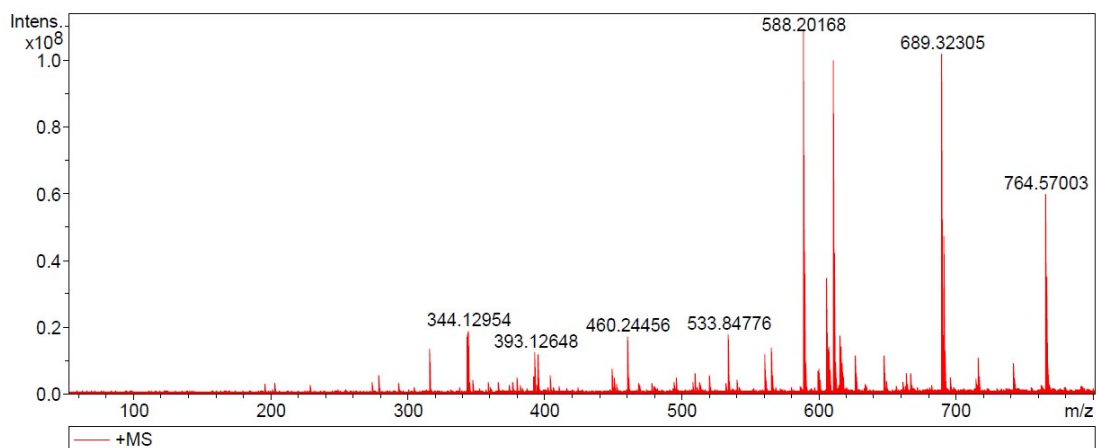

Figure S17. Mass spectrum of compound AMA.

#### 4. Compositions of TN

**Table S1. Compositions of TN**

| Sample                       | $\lambda_{\text{prestretch}}^a$ | $^b$ Weight percentage |       |       | $^c$ Crosslinker ratio |         |            |
|------------------------------|---------------------------------|------------------------|-------|-------|------------------------|---------|------------|
|                              |                                 | Swt %                  | Dwt % | Twt % | [AMA] /%               | [RH] /% | [EGDMA] /% |
| TN <sub>0.5AMA/0.4RH</sub>   | 2.8                             | 8                      | 15    | 77    | 0.04                   | 0.06    | 0.039      |
| TN <sub>0.25AMA+0.25RH</sub> | 3.2                             | 6                      | 30    | 64    | 0.015                  | 0.015   | 0.047      |

<sup>a</sup> The prestretch of chains of the first network was determined using the thicknesses:  $\lambda_{\text{prestretch}} = h/h_{\text{SN}}$ .  $h_{\text{SN}}$  and  $h$  represented the thickness of first network elastomer and the final triple network elastomer.

<sup>b</sup> Swt, Dwt and Twt represented the weight percentage of the first, second and third network in the TN elastomer globally.

<sup>c</sup> [AMA], [RH] and [EGDMA] represented the corresponding crosslinker ratio in polymer globally.

#### 5. IR spectra, DSC and TG profiles

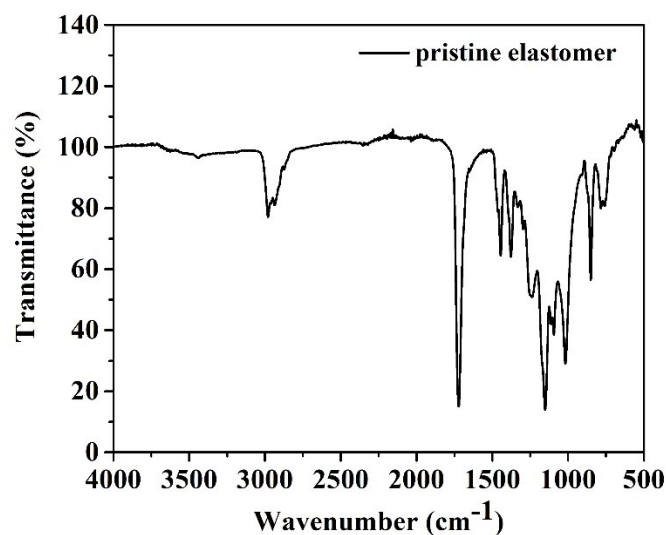

**Figure S18.** IR spectrum of pristine TN<sub>0.5AMA/0.4RH</sub> elastomer.

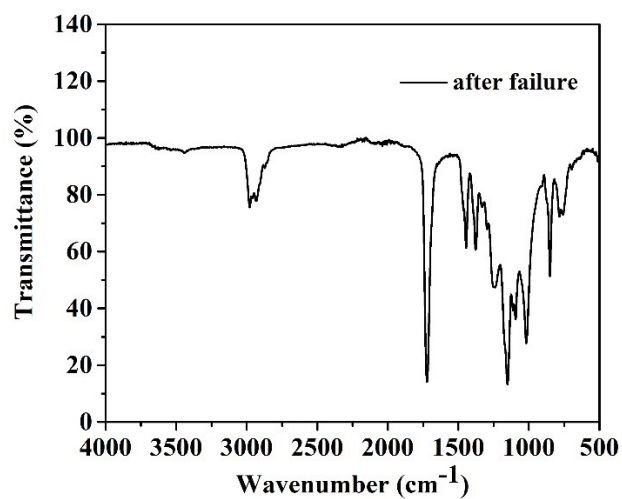

Figure S19. IR spectrum of TN<sub>0.5AMA/0.4RH</sub> elastomer after failure.

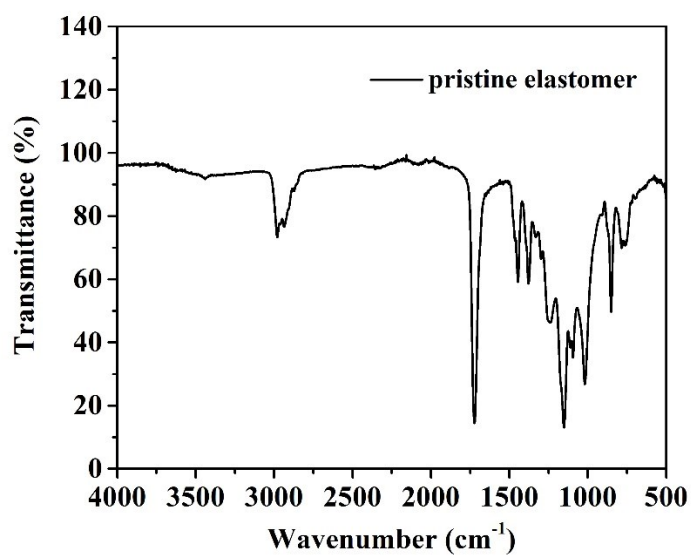

Figure S20. IR spectrum of pristine TN<sub>0.25AMA+0.25RH</sub> elastomer.

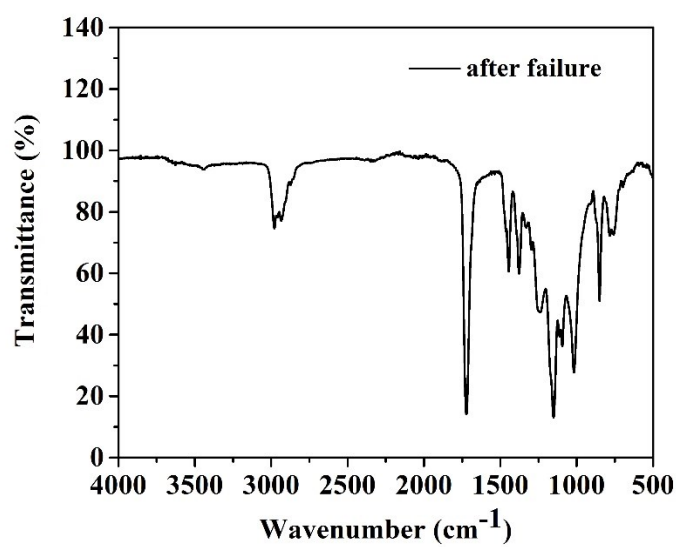

**Figure S21.** IR spectrum of  $TN_{0.25}AMA+0.25RH$  elastomer after failure.

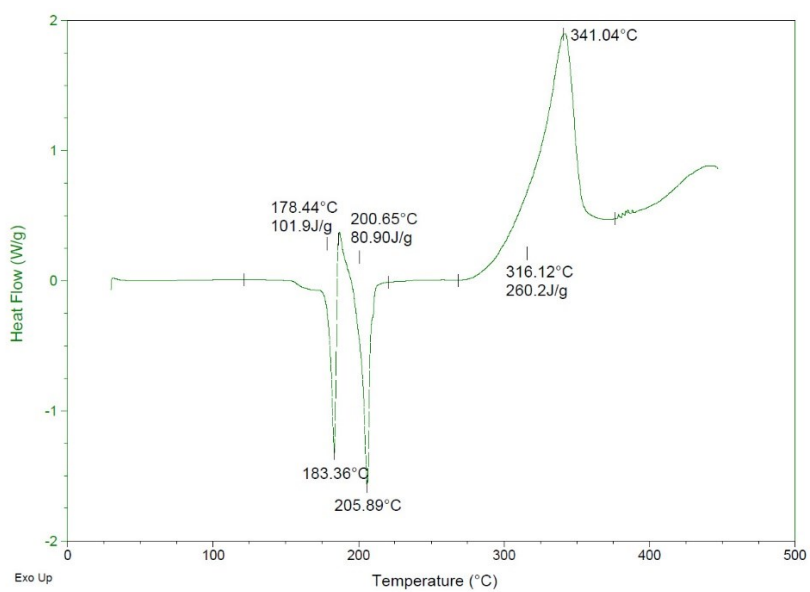

**Figure S22.** DSC curve of compound AMA.

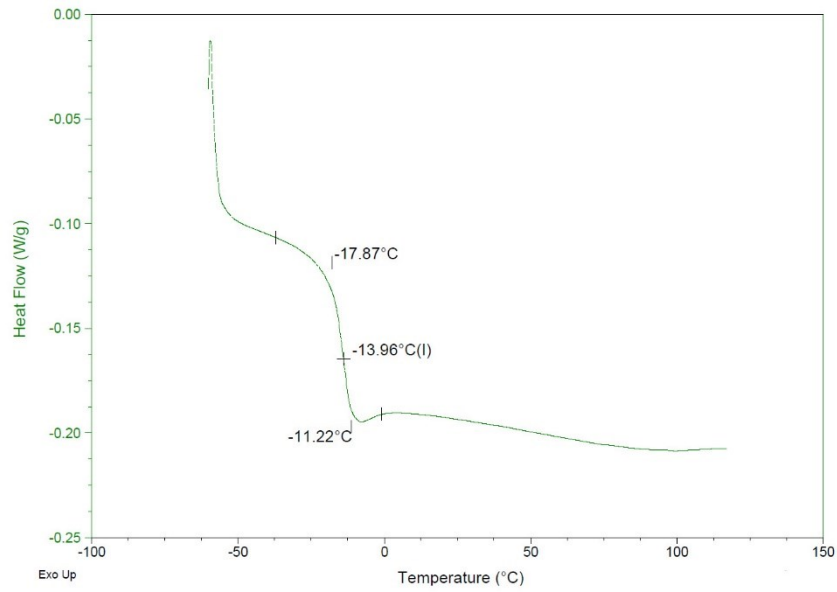

**Figure S23.** DSC curve of the TN<sub>0.5</sub>AMA/0.4RH elastomer.

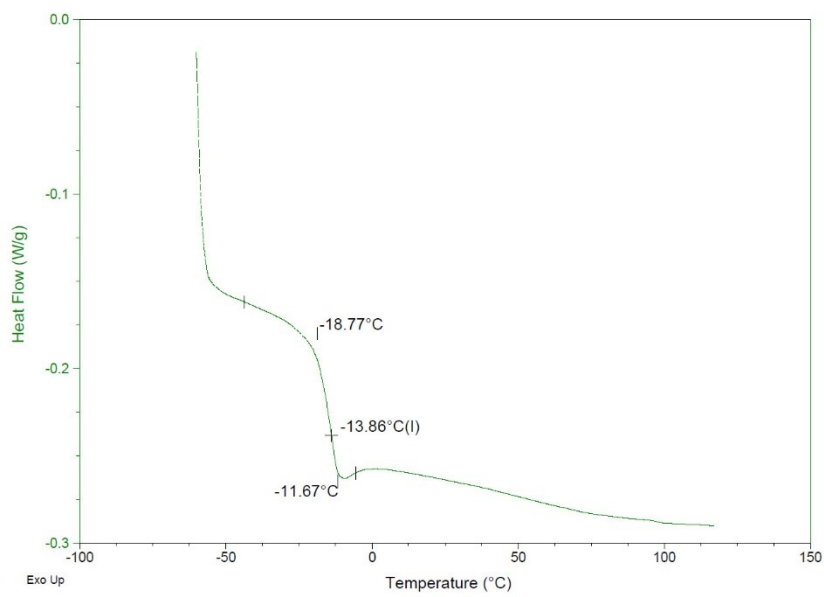

**Figure S24.** DSC curve of the TN<sub>0.25</sub>AMA+0.25RH elastomer.

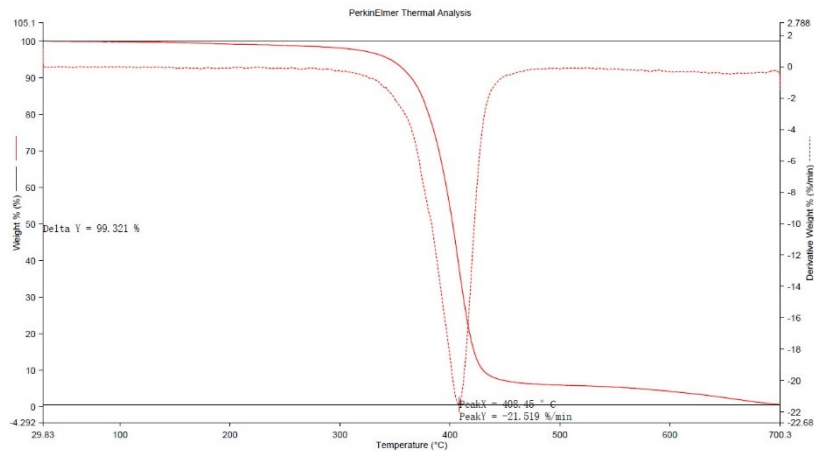

Figure S25. TG profile of the TN<sub>0.5</sub>AMA/0.4RH elastomer.

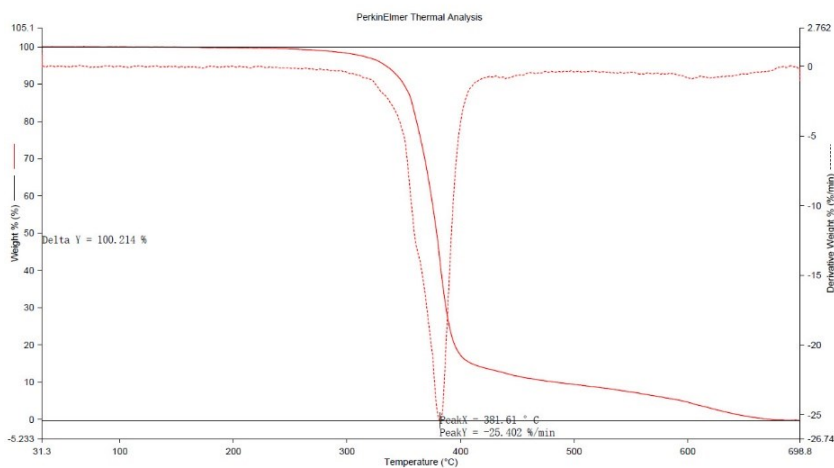

Figure S26. TG profile of the TN<sub>0.25</sub>AMA+0.25RH elastomer.

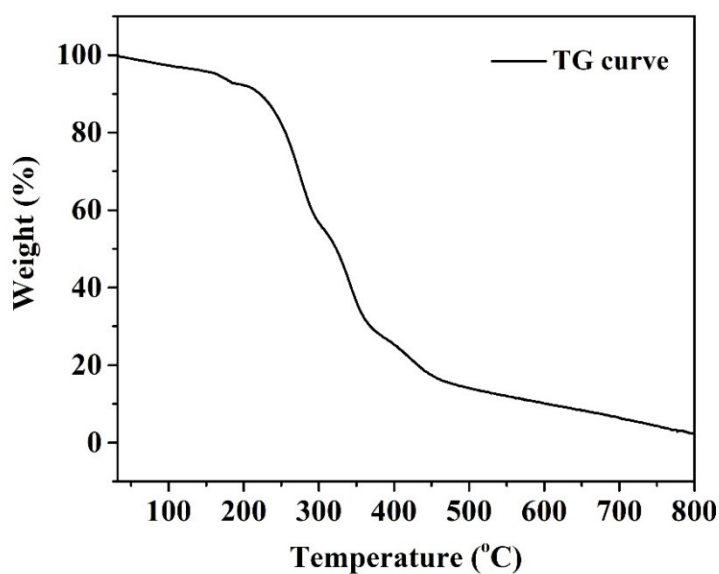

Figure S27. TG profile of the compound AMA.

## 6. Uniaxial tension of the elastomers

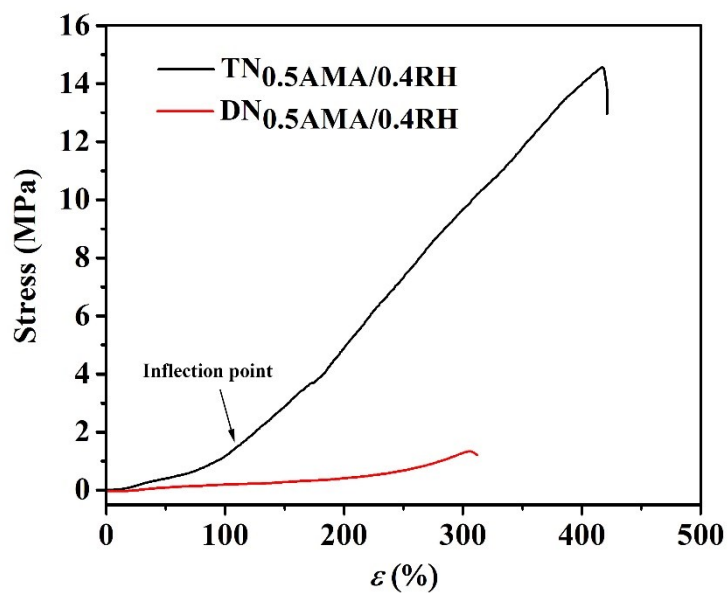

**Figure S28.** Stress-strain curves of the TN<sub>0.5</sub>AMA/0.4RH and DN<sub>0.5</sub>AMA/0.4RH elastomer.

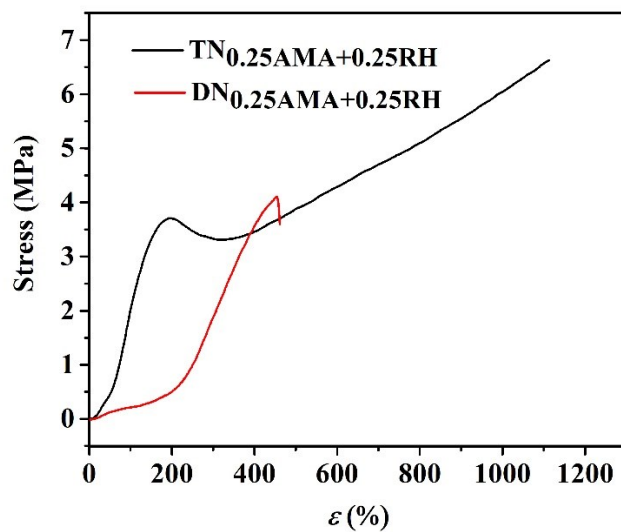

**Figure S29.** Stress-strain curves of the TN<sub>0.25</sub>AMA+0.25RH and DN<sub>0.25</sub>AMA+0.25RH elastomer.

**Table S2.** Mechanical properties of elastomers; shown are the Young's modulus  $E$  (Young's modulus was calculated by the slope of the stress-strain curve at the initial stage of the elongation), true stress at break, and strain at break ( $\lambda_{\text{break}}$ )



| Sample                       | $T$ ( $^{\circ}\text{C}$ ) | $\sigma$ (MPa) | $\epsilon_{\text{break}}$ | $E$ (MPa) |
|------------------------------|----------------------------|----------------|---------------------------|-----------|
| TN <sub>0.5AMA/0.4RH</sub>   | 25                         | 14.6           | 4.17                      | 1.01      |
| DN <sub>0.5AMA/0.4RH</sub>   | 25                         | 1.4            | 3.12                      | 0.22      |
| TN <sub>0.25AMA+0.25RH</sub> | 25                         | 6.6            | 11.1                      | 0.92      |
| DN <sub>0.25AMA+0.25RH</sub> | 25                         | 4.1            | 4.6                       | 0.25      |

## 7. Fluorometric and ultraviolet analysis

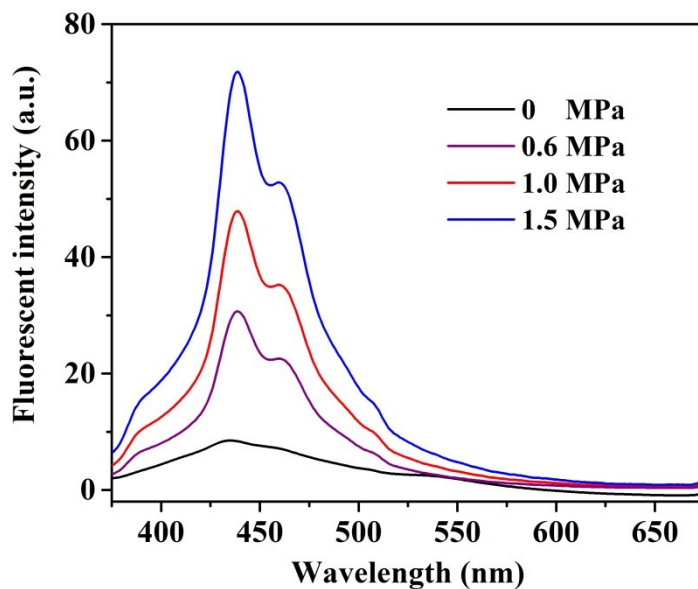

Figure S30. Fluorescent spectra of TN<sub>0.5AMA/0.4RH</sub> elastomer under low stress ( $< 1.8$  MPa).

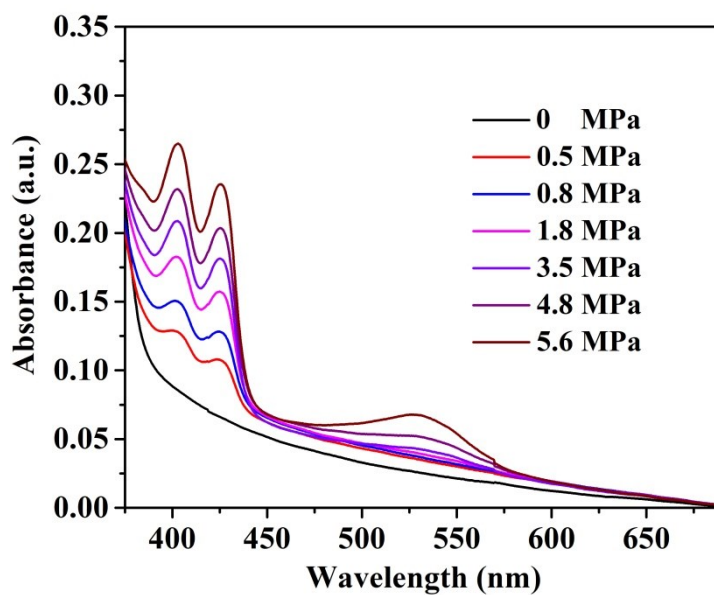

Figure S31. Absorption spectra of TN<sub>0.5AMA/0.4RH</sub> elastomer under different stress.

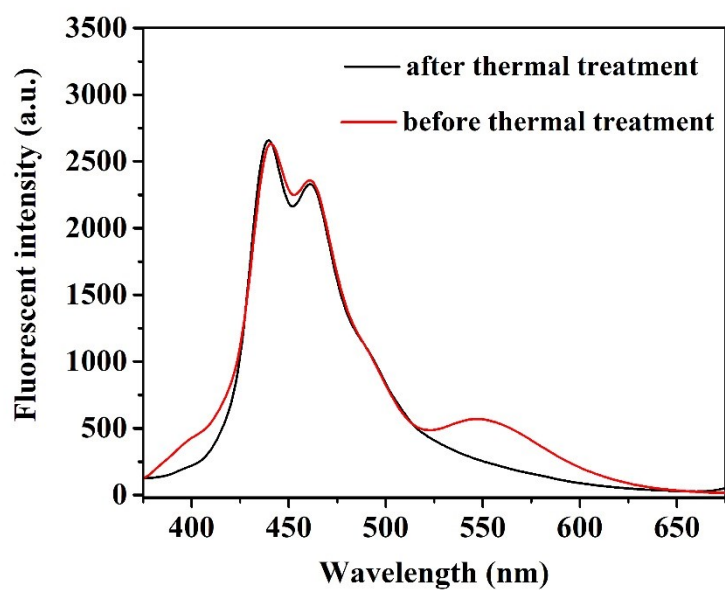

Figure S32. Fluorescent spectra of stretched  $TN_{0.5AMA/0.4RH}$  elastomer before and after heat treatment (5 minutes at 60 °C).

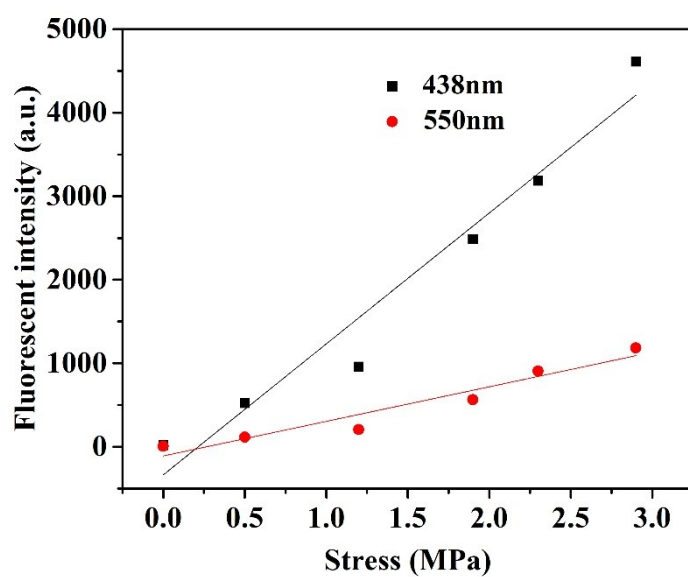

Figure S33. Fluorescent intensity of  $TN_{0.25AMA+0.25RH}$  at 438 and 550 nm as a function of mechanical stress.

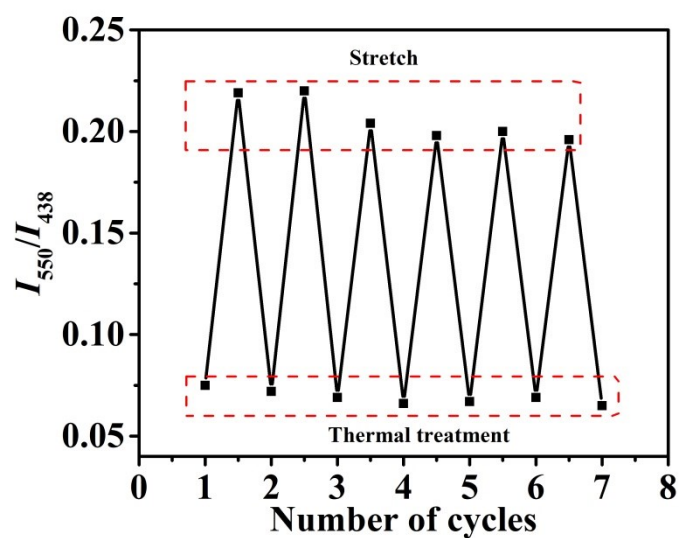

**Figure S34.** Relative intensities of the emission at 550 and 438 nm of  $TN_{0.5AMA/0.4RH}$  elastomer as a function of the repeated cycle of stretch (the stress is 6 MPa) and thermal treatment (5 minutes at 60 °C)

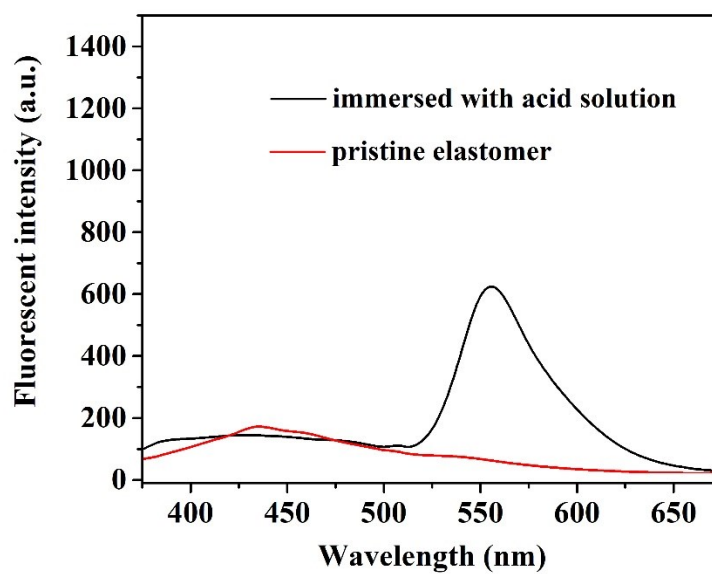

**Figure S35.** Fluorescent spectra of  $TN_{0.5AMA/0.4RH}$  elastomer before and after immersed with methane sulfonic acid.

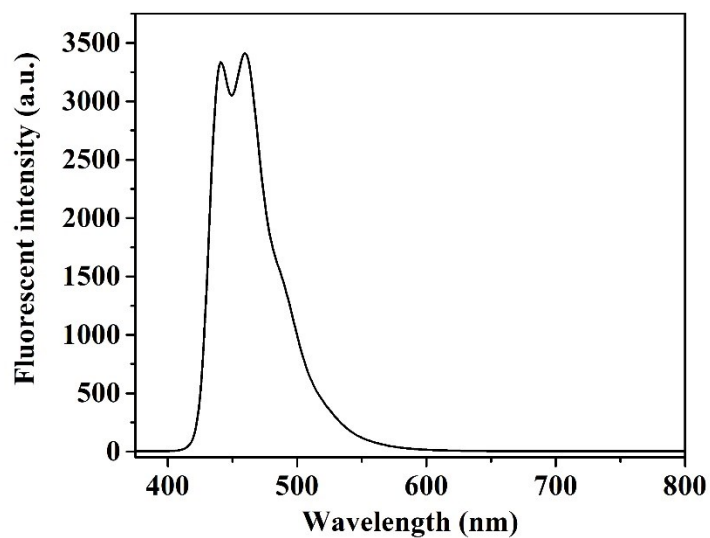

Figure S36. Fluorescent spectrum of the reference compound **6** in THF ( $M=1\times 10^{-5}$ ).

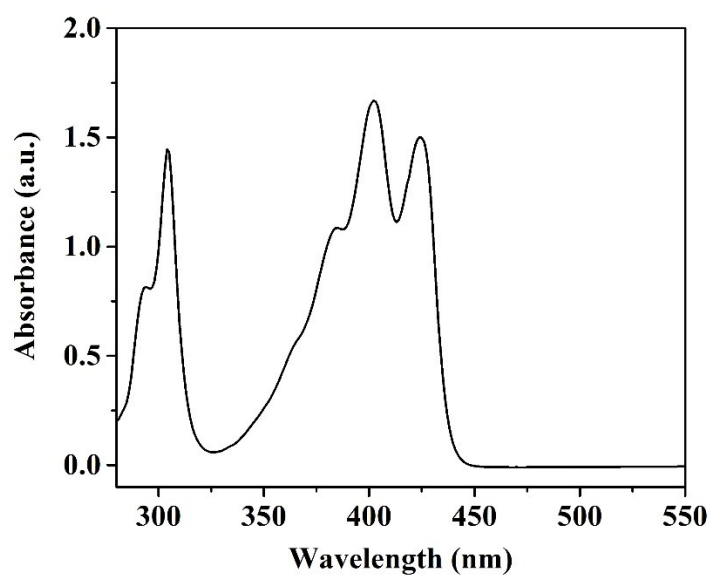

Figure S37. Absorption spectrum of the reference compound **6** in THF ( $M=1\times 10^{-5}$ ).

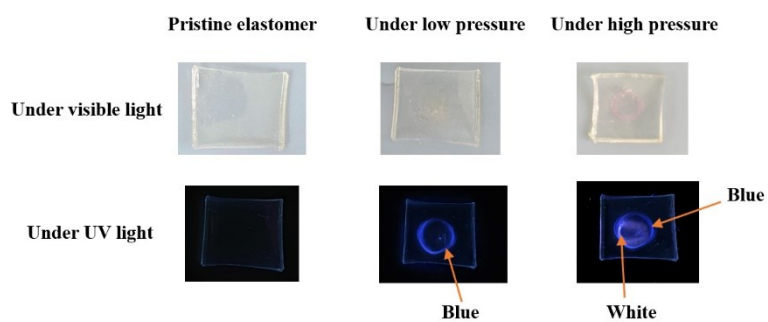

Figure S38. Images of the  $TN_{0.5AMA/0.4RH}$  elastomer under relatively low and high pressure.
